# Supplementary material
Source: PubMed Central journal article supplement (PMC3502979)
Supplement: JCM.02659-12_zjm999092153so2.pdf [file JCM.02659-12_zjm999092153so2.pdf]

**Supplemental Table 1: Primers and probes used in this study.**

| Target                                        | Primer/<br>probe | Sequence (5'-3')                                     | 5'-label | 3'-label      | Working<br>concentration |
|-----------------------------------------------|------------------|------------------------------------------------------|----------|---------------|--------------------------|
| EBV                                           | Forward          | GCCAGACAGCAGCCAATTGT                                 |          |               | 300 nM                   |
|                                               | Reverse<br>Probe | GACTCCTGGCGCTCTGATG<br>ACTGCCCTGGTATAAAGTGGTCC       | 6FAM     | TAMRA         | 300 nM<br>150 nM         |
| CMV                                           | Forward          | GTCAGCGTTCGTGTTTCCCA                                 |          |               | 300 nM                   |
| <i>N. meningitidis</i><br>( <i>ctrA</i> gene) | Reverse<br>Probe | GGGACACAACACCGTAAAGC<br>CCCGCAACCCGCAACCCTTCATG      | 6FAM     | Iowa Black FQ | 300 nM<br>100 nM         |
|                                               | Forward          | GCTGCGGTAGGTGGTTCAA                                  |          |               | 300 nM                   |
| Influenza A                                   | Reverse<br>Probe | TTGTCGCGGATTTGCAACTA<br>TGTGCAGCTGACACGTGGCAATGT     | 6FAM     | TAMRA         | 300 nM<br>200 nM         |
|                                               | Forward          | CATGGARTGGCTAAAGACAAGACC                             |          |               | 900 nM                   |
|                                               | Reverse<br>Probe | AGGGCATTTTGGACAAAKCGTCTA<br>TGCAGTCCTCGCTCACTGGGCACG | 6FAM     | BHQ-1         | 900 nM<br>250 nM         |
